# Supplementary material
Source: publisher figshare collection journal article supplement (https://diabetesjournals.figshare.com/ndownloader/files/25999742)
Supplement: Supplementary file 1 [file 25999742]

Supporting Material for:  
Quantifying Variation in Treatment Utilization for Type 2 Diabetes Across Five Major University of  
California Health Systems

| <b>Page</b> | <b>Title</b>                                                                                                                                                |
|-------------|-------------------------------------------------------------------------------------------------------------------------------------------------------------|
| 2           | Supplemental Figure S1: Significant Differences in Choice of Treatment Post-Metformin Monotherapy for Institutions and Individual Providers                 |
| 3           | Supplemental Figure S2: Significant Differences in Choice of Treatment Post-Metformin & Sulfonylurea Dual Therapy for Institutions and Individual Providers |
| 4           | Supplemental Figure S3: Significant Differences for In-Class Choice of Treatment for Institutions and Individual Providers                                  |
| 5           | Supplemental Table S1: Demographics of patients in each of the two out-class cohorts                                                                        |
| 6           | Supplemental Table S2: Demographics of patients in each in-class cohort                                                                                     |
| 7           | Supplemental Table S3: Demographics of patients with high cardiovascular risk                                                                               |
| 8           | Supplemental Table S4: Significant differences across the UC sites in out-class choice of treatment post-Metformin monotherapy                              |
| 9           | Supplemental Table S5: Number of providers with significant differences in choice of treatment post-Metformin monotherapy                                   |
| 10          | Supplemental Table S6: Significant differences across the UC sites in out-class choice of post-Metformin & Sulfonylurea dual therapy                        |
| 11          | Supplemental Table S7: Number of providers with significant differences in choice of treatment post-Metformin & Sulfonylurea dual therapy                   |
| 12          | Supplemental Table S8: Significant differences across the UC sites in first choice of Sulfonylurea                                                          |
| 13          | Supplemental Table S9: Number of providers with significant differences in first choice of Sulfonylurea.                                                    |
| 14          | Supplemental Table S10: Significant differences across the UC sites in first choice of DPP-4i.                                                              |
| 15          | Supplemental Table S11: Number of providers with significant differences in first choice of DPP-4i                                                          |
| 16          | Supplemental Table S12: Significant differences across the UC sites in first choice of SGLT-2i                                                              |
| 17          | Supplemental Table S13: Number of providers with significant differences in first choice of SGLT-2i                                                         |
| 18          | Supplemental Table S14: Significant differences across the UC sites in first choice of GLP-1RA                                                              |
| 19          | Supplemental Table S15 Number of providers with significant differences in first choice of GLP-1RA                                                          |
| 19          | Supplemental Table S16: Significant differences across the UC sites in first choice of Meglitinides                                                         |
| 20          | Supplemental Table S17: Number of providers with significant differences in first choice of Meglitinide                                                     |
| 20          | Supplemental Table S18: Significant differences across the UC sites in first choice of AGi                                                                  |
| 21          | Supplemental Table S19: Number of providers with significant differences in first choice of AGi                                                             |
| 21          | Supplemental Table S20: Significant differences across the UC sites cardioprotective medication utilization.                                                |
| 21          | Supplemental Table S21: Number of providers with significant differences in cardioprotective medication utilization.                                        |

## Significant Differences in Choice of Treatment Post-Metformin Monotherapy

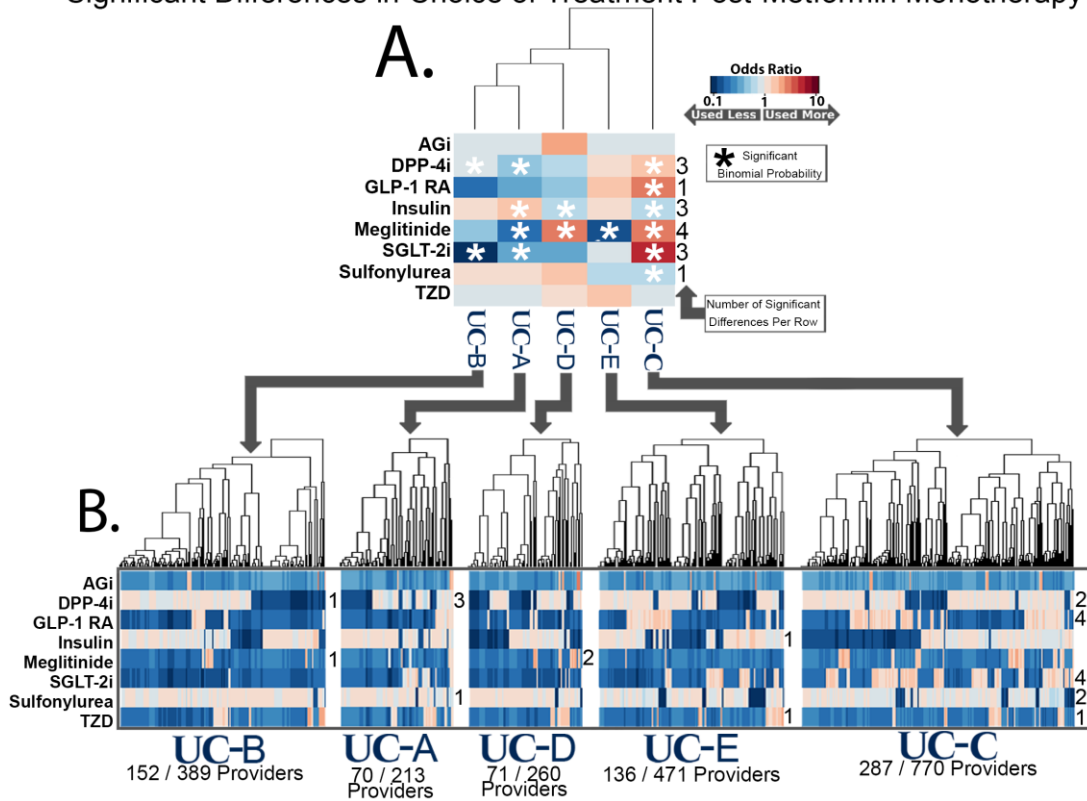

### Supplemental Figure S1: Significant Differences in Treatment Choice Post-Metformin Monotherapy.

Heatmap depicting the odds ratio of medical institutions (A) and individual providers (B) for frequency of each out-class treatment utilization. Here, each unit of the x-axis columns represents the likelihood of choosing that medication class for a single medical institution compared to the other four medical institutions (A) or a single provider within a medical institution compared to all other providers (B). For (B), only providers with at least three prescriptions were depicted and the number for each site are listed below each plot. The ordering of the columns of institutions or providers is determined by similarity in prescription patterns, depicted in the dendrogram above each plot. The y-axis (rows) represent medication classes available for utilization post-Metformin monotherapy. The number of providers with significant differences for each medication class are enumerated on the right-hand side of each plot. An institution or provider is determined to have a significantly different frequency for a particular medication class using binomial probabilities with three separate cohort matching techniques to account for HbA1c, Framingham Cardiovascular Risk Score, and propensity score trained using relevant data from the EHR.

## Significant Differences in Choice of Treatment Post-Metformin Sulfonyurea Dual Therapy

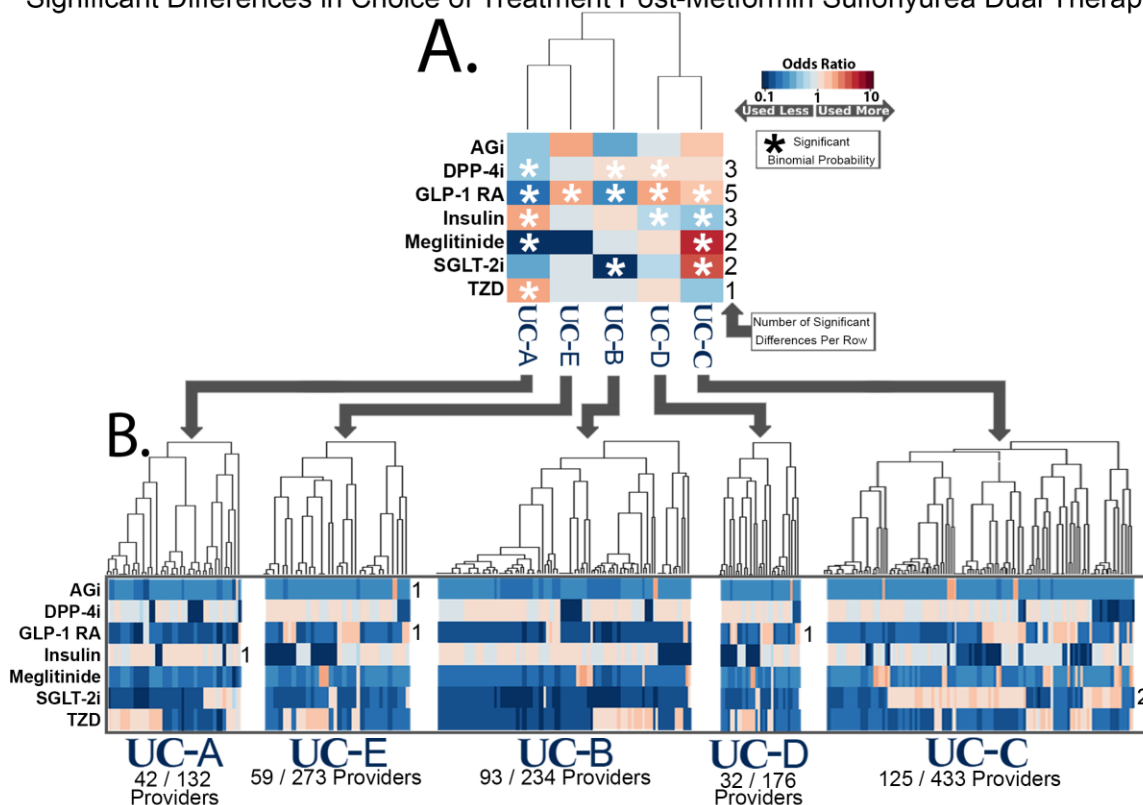

**Supplemental Figure S2: Significant Differences in Choice of Treatment Post-Metformin & Sulfonylurea Dual Therapy.** Heatmap depicting the odds ratio of medical institutions (A) and individual providers (B) for frequency of each out-class treatment choice. Here, each unit of the x-axes represents a single medical institution compared to all other medical institutions (A) or a single provider within a medical institution compared to all other providers (B). For (B), only providers with at least three prescriptions were depicted and the number for each site are listed below each plot. The order of the institutions or providers in the x-axes is determined by similarity in prescription patterns, depicted in the dendrogram above each plot. The y-axes represent different medication classes available for choice of out-class treatment and the number of significant differences for each medication class are enumerated on the right-hand side of each plot. An institution or provider is determined to have a significantly different frequency for a particular medication class using binomial probabilities with three separate cohort matching techniques to account for HbA1c, Framingham Cardiovascular Risk Score, and propensity score trained using relevant data from the EHR.

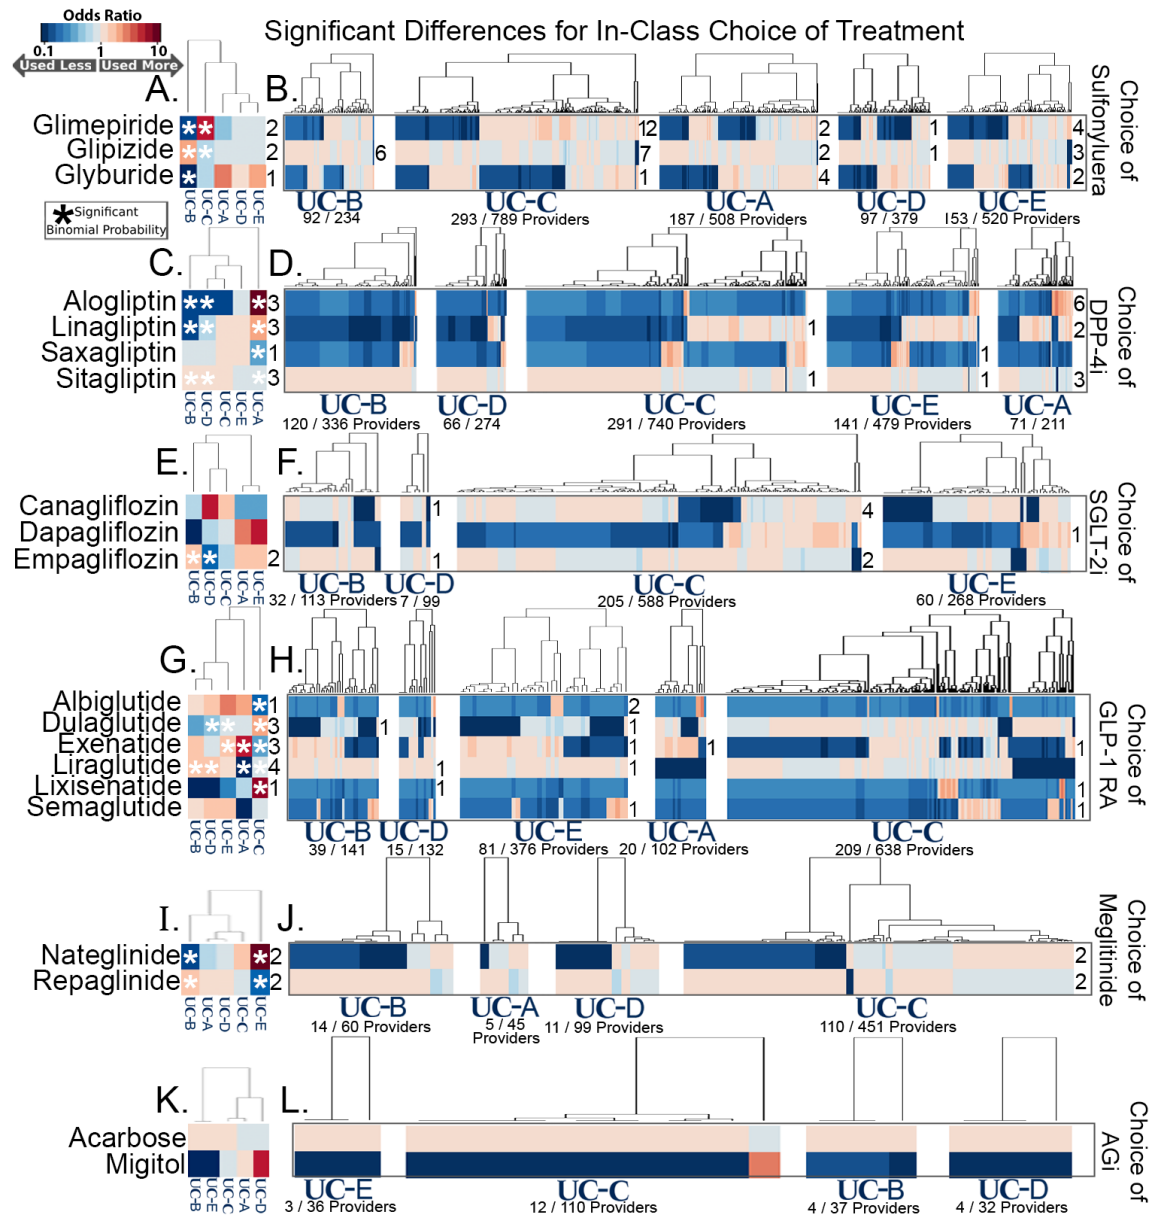

**Supplemental Figure S3: Significant Differences for In-Class Choice of Treatment.** Heatmap depicting the odds ratio of medical institutions (A, C, E, G, I, & K) and individual providers (B, D, F, H, J, & L) for frequency of each in-class treatment choice. For each site, only providers with at least three prescriptions were depicted and the number for each site are listed below each plot. Here, each unit of the x-axes represents a single medical institution compared to all other medical institutions or a single provider within a medical institution compared to all other providers. The order of the institutions or providers in the x-axes is determined by similarity in prescription patterns, depicted in the dendrogram above each plot. The y-axes represent different medication classes available for choice of in-class treatment and the number of significant differences for each medication class are enumerated on the right-hand side of each plot. An institution or provider is determined to have a significantly different frequency for a particular medication class using binomial probabilities with three separate cohort matching techniques to account for HbA1c, Framingham Cardiovascular Risk Score, and propensity score trained using relevant data from the EHR.

**Supplemental Table S1: Demographics of patients in each of the two out-class cohorts.** The post-Metformin monotherapy group describes a cohort of patients changing their T2D medication regimen from Metformin monotherapy to either dual therapy or to insulin. The post-Metformin & Sulfonylurea dual therapy group describes a cohort of patients changing their T2D medication regimen from dual therapy Metformin & Sulfonylurea to either a triple therapy or to insulin.

|                           | <b>Post-Metformin Monotherapy</b> | <b>Post-Metformin &amp; Sulfonylurea Dual Therapy</b> |
|---------------------------|-----------------------------------|-------------------------------------------------------|
| Total Patients            | 8,449                             | 3,364                                                 |
| Age ≥ 80                  | 892 (11%)                         | 367 (11%)                                             |
| Age 70-80                 | 1,511 (18%)                       | 667 (20%)                                             |
| Age 60-70                 | 2,648 (31%)                       | 1,092 (32%)                                           |
| Age 50-60                 | 2,199 (26%)                       | 849 (25%)                                             |
| Age ≤ 50                  | 1,199 (14%)                       | 389 (12%)                                             |
| BMI: Morbid Obesity       | 991 (12%)                         | 355 (11%)                                             |
| BMI: Obese                | 3,245 (38%)                       | 1,262 (38%)                                           |
| BMI: Overweight           | 2,348 (28%)                       | 943 (28%)                                             |
| HbA1c: ≥9%                | 2,906 (34%)                       | 1,559 (46%)                                           |
| HbA1c: 7-9%               | 3,792 (45%)                       | 1,464 (44%)                                           |
| High LDL                  | 553 (6.5%)                        | 177 (5.3%)                                            |
| Low HDL                   | 3,227 (38%)                       | 1,348 (40%)                                           |
| High SBP                  | 4,184 (50%)                       | 1,739 (52%)                                           |
| High Triglycerides        | 6,354 (75%)                       | 2,602 (77%)                                           |
| Asian                     | 1,029 (12%)                       | 420 (12%)                                             |
| Black or African American | 404 (4.8%)                        | 161 (4.8%)                                            |
| White or Caucasian        | 4,672 (55%)                       | 1,833 (54%)                                           |
| Hispanic or Latino        | 2,135 (25%)                       | 1,019 (30%)                                           |
| Asthma                    | 911 (11%)                         | 314 (9.3%)                                            |
| COPD                      | 332 (3.9%)                        | 154 (4.6%)                                            |
| Osteoporosis              | 479 (5.7%)                        | 196 (5.8%)                                            |
| GERD                      | 1,793 (21%)                       | 758 (23%)                                             |
| Insomnia or Sleep Apnea   | 1,926 (23%)                       | 726 (22%)                                             |
| Rheumatic Disease         | 115 (1.4%)                        | 31 (0.92%)                                            |
| Depression                | 1,423 (17%)                       | 559 (17%)                                             |
| Hypertension              | 7,452 (88%)                       | 3,007 (89%)                                           |
| CKD                       | 1,264 (15%)                       | 648 (19%)                                             |
| Liver Damage              | 997 (12%)                         | 400 (12%)                                             |
| Heart Attack              | 295 (3.5%)                        | 121 (3.6%)                                            |
| Heart Failure             | 529 (6.3%)                        | 228 (6.8%)                                            |
| PAD                       | 287 (3.4%)                        | 133 (4%)                                              |
| Heart Block               | 187 (2.2%)                        | 80 (2.4%)                                             |
| Stroke                    | 274 (3.2%)                        | 129 (3.8%)                                            |
| Cardiomyopathy            | 212 (2.5%)                        | 86 (2.6%)                                             |
| Arrhythmias               | 1351 (16%)                        | 519 (15%)                                             |
| Myocarditis               | 524 (6.2%)                        | 226 (6.7%)                                            |

## Supplemental Table S2: Demographics of patients in each in-class cohort.

Each cohort represents the first time each patient was prescribed a medication initiated by the University of California within the Sulfonylurea, DPP-4i, SGLT-2i, GLP-1RA, AGi, or Meglitinide medication classes.

|                     | Sulfonylurea | DPP-4i      | GLP-1RA     | SGLT-2i     | Meglitinide | AGi       |
|---------------------|--------------|-------------|-------------|-------------|-------------|-----------|
| Total Patients      | 10,548       | 7,709       | 3,932       | 3,461       | 1,515       | 361       |
| Age ≥ 80            | 1,587 (15%)  | 1,339 (17%) | 229 (5.8%)  | 210 (6.1%)  | 402 (27%)   | 91 (25%)  |
| Age 70-80           | 2,101 (20%)  | 1,750 (23%) | 695 (18%)   | 694 (20%)   | 404 (27%)   | 93 (26%)  |
| Age 60-70           | 3,219 (31%)  | 2,351 (30%) | 1,351 (34%) | 1,222 (35%) | 387 (26%)   | 106 (29%) |
| Age 50-60           | 2,449 (23%)  | 1,569 (20%) | 1,074 (27%) | 901 (26%)   | 236 (16%)   | 50 (14%)  |
| Age ≤ 50            | 1,192 (11%)  | 700 (9.1%)  | 583 (15%)   | 434 (13%)   | 86 (5.7%)   | 21 (5.8%) |
| BMI: Morbid Obesity | 1,023 (9.7%) | 714 (9.3%)  | 756 (19%)   | 411 (12%)   | 96 (6.3%)   | 23 (6.4%) |
| BMI: Obese          | 3,863 (37%)  | 2,820 (37%) | 1,928 (49%) | 1,517 (44%) | 433 (29%)   | 115 (32%) |
| BMI: Overweight     | 3,014 (29%)  | 2,214 (29%) | 803 (20%)   | 994 (29%)   | 463 (31%)   | 112 (31%) |
| HbA1c: ≥9%          | 3,596 (34%)  | 2,018 (26%) | 1,357 (35%) | 1,156 (33%) | 339 (22%)   | 78 (22%)  |
| HbA1c: 7-9%         | 4,656 (44%)  | 3,863 (50%) | 1,775 (45%) | 1,757 (51%) | 779 (51%)   | 176 (49%) |
| High LDL            | 711 (6.7%)   | 372 (4.8%)  | 156 (4%)    | 146 (4.2%)  | 49 (3.2%)   | 7 (1.9%)  |
| Low HDL             | 4,102 (39%)  | 2,835 (37%) | 1,547 (39%) | 1,308 (38%) | 502 (33%)   | 128 (35%) |
| High SBP            | 5,142 (49%)  | 3,599 (47%) | 2,051 (52%) | 1,761 (51%) | 639 (42%)   | 136 (38%) |
| High Triglycerides  | 8,037 (76%)  | 5,835 (76%) | 3,016 (77%) | 2,729 (79%) | 1,130 (75%) | 272 (75%) |
| Asian               | 1,352 (13%)  | 1,216 (16%) | 296 (7.5%)  | 375 (11%)   | 188 (12%)   | 74 (20%)  |
| Black or African    | 567 (5.4%)   | 341 (4.4%)  | 148 (3.8%)  | 67 (1.9%)   | 32 (2.1%)   | 8 (2.2%)  |
| White or Caucasian  | 5,657 (54%)  | 3,937 (51%) | 2,250 (57%) | 1,769 (51%) | 748 (49%)   | 189 (52%) |
| Hispanic or Latino  | 2,685 (25%)  | 1,558 (20%) | 789 (20%)   | 636 (18%)   | 251 (17%)   | 59 (16%)  |
| Asthma              | 893 (8.5%)   | 817 (11%)   | 535 (14%)   | 359 (10%)   | 144 (9.5%)  | 37 (10%)  |
| COPD                | 419 (4%)     | 361 (4.7%)  | 209 (5.3%)  | 112 (3.2%)  | 97 (6.4%)   | 19 (5.3%) |
| Osteoporosis        | 514 (4.9%)   | 586 (7.6%)  | 210 (5.3%)  | 186 (5.4%)  | 152 (10%)   | 37 (10%)  |
| GERD                | 1,916 (18%)  | 1,870 (24%) | 1,021 (26%) | 786 (23%)   | 375 (25%)   | 90 (25%)  |
| Insomnia / Sleep    | 1,926 (18%)  | 1,780 (23%) | 1,262 (32%) | 901 (26%)   | 321 (21%)   | 91 (25%)  |
| Rheumatic Disease   | 123 (1.2%)   | 114 (1.5%)  | 92 (2.3%)   | 61 (1.8%)   | 26 (1.7%)   | 7 (1.9%)  |
| Depression          | 1,522 (14%)  | 1,318 (17%) | 900 (23%)   | 562 (16%)   | 229 (15%)   | 61 (17%)  |
| Hypertension        | 9,304 (88%)  | 6,956 (90%) | 3,633 (92%) | 3,198 (92%) | 1,378 (91%) | 329 (91%) |
| CKD                 | 2,002 (19%)  | 2,121 (28%) | 1,032 (26%) | 672 (19%)   | 599 (40%)   | 99 (27%)  |
| Liver Damage        | 970 (9.2%)   | 936 (12%)   | 631 (16%)   | 514 (15%)   | 190 (13%)   | 32 (8.9%) |
| Heart Attack        | 343 (3.3%)   | 355 (4.6%)  | 192 (4.9%)  | 145 (4.2%)  | 81 (5.3%)   | 12 (3.3%) |
| Heart Failure       | 749 (7.1%)   | 769 (10%)   | 372 (9.5%)  | 241 (7%)    | 194 (13%)   | 33 (9.1%) |
| PAD                 | 380 (3.6%)   | 412 (5.3%)  | 182 (4.6%)  | 151 (4.4%)  | 113 (7.5%)  | 24 (6.6%) |
| Heart Block         | 229 (2.2%)   | 243 (3.2%)  | 132 (3.4%)  | 98 (2.8%)   | 59 (3.9%)   | 9 (2.5%)  |
| Stroke              | 381 (3.6%)   | 324 (4.2%)  | 162 (4.1%)  | 110 (3.2%)  | 56 (3.7%)   | 24 (6.6%) |
| Cardiomyopathy      | 306 (2.9%)   | 269 (3.5%)  | 149 (3.8%)  | 110 (3.2%)  | 66 (4.4%)   | 9 (2.5%)  |
| Arrhythmias         | 1,552 (15%)  | 1,494 (19%) | 779 (20%)   | 601 (17%)   | 330 (22%)   | 71 (20%)  |
| Myocarditis         | 619 (5.9%)   | 720 (9.3%)  | 396 (10%)   | 268 (7.7%)  | 100 (6.6%)  | 23 (6.4%) |

**Supplemental Table S3: Demographics of patients with high cardiovascular risk.** Demographic information for the most recent medication change for patients in the highest quintile of cardiovascular risk at each site.

|                           | UC-A        | UC-B        | UC-C         | UC-D        | UC-E        |
|---------------------------|-------------|-------------|--------------|-------------|-------------|
| Total Patients            | 6,721       | 5,896       | 14,743       | 3,080       | 6,131       |
| Age ≥ 80                  | 1,892 (28%) | 1,434 (24%) | 4,379 (30%)  | 1,396 (45%) | 1,654 (27%) |
| Age 70-80                 | 2,008 (30%) | 1,944 (33%) | 5,791 (39%)  | 956 (31%)   | 2,452 (40%) |
| Age 60-70                 | 2,075 (31%) | 2,065 (35%) | 3,974 (27%)  | 599 (19%)   | 1,818 (30%) |
| Age 50-60                 | 699 (10%)   | 436 (7.4%)  | 589 (4%)     | 103 (3.3%)  | 206 (3.4%)  |
| BMI: Morbid Obesity       | 518 (7.7%)  | 879 (15%)   | 1,229 (8.3%) | 50 (1.6%)   | 487 (7.9%)  |
| BMI: Obese                | 2,699 (40%) | 2,836 (48%) | 5,871 (40%)  | 130 (4.2%)  | 2,492 (41%) |
| BMI: Overweight           | 2,306 (34%) | 1,606 (27%) | 5,067 (34%)  | 154 (5%)    | 2,211 (36%) |
| HbA1c: ≥9%                | 1,660 (25%) | 1,316 (22%) | 2,800 (19%)  | 727 (24%)   | 1,003 (16%) |
| HbA1c: 7-9%               | 4,347 (65%) | 3,832 (65%) | 9,194 (62%)  | 2,019 (66%) | 3,895 (64%) |
| High LDL                  | 243 (3.6%)  | 169 (2.9%)  | 437 (3%)     | 179 (5.8%)  | 124 (2%)    |
| Low HDL                   | 3,649 (54%) | 3,328 (56%) | 5,901 (40%)  | 664 (22%)   | 2,894 (47%) |
| High SBP                  | 5,916 (88%) | 5,044 (86%) | 12,835 (87%) | 2,881 (94%) | 5,357 (87%) |
| High Triglycerides        | 2,503 (37%) | 2,411 (41%) | 6,216 (42%)  | 1,167 (38%) | 2,563 (42%) |
| Asian                     | 915 (14%)   | 436 (7.4%)  | 961 (6.5%)   | 1,028 (33%) | 778 (13%)   |
| Black or African American | 209 (3.1%)  | 490 (8.3%)  | 1,283 (9%)   | 497 (16%)   | 412 (6.7%)  |
| White or Caucasian        | 4,590 (68%) | 3,889 (66%) | 8,578 (58%)  | 904 (29%)   | 3,631 (59%) |
| Hispanic or Latino        | 2,551 (38%) | 644 (11%)   | 2,078 (14%)  | 262 (8.5%)  | 1,047 (17%) |
| Asthma                    | 269 (4%)    | 630 (11%)   | 1,314 (8.9%) | 459 (15%)   | 574 (9.4%)  |
| COPD                      | 368 (5.5%)  | 473 (8%)    | 1,246 (8.5%) | 281 (9.1%)  | 679 (11%)   |
| Osteoporosis              | 175 (2.6%)  | 153 (2.6%)  | 589 (4%)     | 611 (20%)   | 448 (7.3%)  |
| GERD                      | 852 (13%)   | 1,483 (25%) | 3,641 (25%)  | 898 (29%)   | 2,155 (35%) |
| Insomnia or Sleep Apnea   | 650 (9.7%)  | 1,265 (21%) | 3,426 (23%)  | 418 (14%)   | 1,524 (25%) |
| Rheumatic Disease         | 65 (0.97%)  | 77 (1.3%)   | 160 (1.1%)   | 78 (2.5%)   | 51 (0.83%)  |
| Depression                | 487 (7.2%)  | 917 (16%)   | 2,303 (16%)  | 776 (25%)   | 1,423 (23%) |
| Hypertension              | 6,316 (94%) | 5,734 (97%) | 14,426 (98%) | 3,029 (98%) | 6,049 (99%) |
| CKD                       | 1,851 (28%) | 1,880 (32%) | 6,893 (47%)  | 1,185 (38%) | 2,874 (47%) |
| Liver Damage              | 521 (7.8%)  | 357 (6.1%)  | 1,364 (9.3%) | 399 (13%)   | 1,137 (19%) |
| Heart Attack              | 200 (3%)    | 354 (6%)    | 927 (6.3%)   | 150 (4.9%)  | 1,030 (17%) |
| Heart Failure             | 748 (11%)   | 857 (15%)   | 2,086 (14%)  | 526 (17%)   | 1,555 (25%) |
| PAD                       | 390 (5.8%)  | 449 (7.6%)  | 1,832 (12%)  | 186 (6%)    | 730 (12%)   |
| Heart Block               | 149 (2.2%)  | 261 (4.4%)  | 668 (4.5%)   | 104 (3.4%)  | 887 (14%)   |
| Stroke                    | 396 (5.9%)  | 287 (4.9%)  | 1,011 (6.9%) | 255 (8.3%)  | 604 (9.9%)  |
| Cardiomyopathy            | 172 (2.6%)  | 222 (3.8%)  | 737 (5%)     | 90 (2.9%)   | 516 (8.4%)  |
| Arrhythmias               | 1,296 (19%) | 1,374 (23%) | 3,937 (27%)  | 1,086 (35%) | 2,952 (48%) |
| Myocarditis               | 546 (8.1%)  | 434 (7.4%)  | 958 (6.5%)   | 323 (10%)   | 2,124 (35%) |

**Supplemental Table S4: Significant differences across the UC sites in out-class choice of treatment post-Metformin monotherapy.** P-Values for the medication class for each UC site are given for binomial probability significance compared to all other UC sites (Binomial P-Value) as well as significance compared to cohorts of equal size matched by A1c, Framingham Cardiovascular Risk Score (FCRS), or propensity score. The order of this table is determined by the most significantly different, i.e. first by the lowest summation of the four p-values then by the largest odds ratio.

|                   | Total<br>Increased<br>To This<br>Class | Odds<br>Ratio<br>Compared<br>to Other<br>UC Sites | FDR-Adj.<br>Binomial<br>P-Value | FDR-Adj.<br>A1c-<br>Matched<br>Binomial<br>P-Value | FDR-Adj.<br>FCRS-<br>Matched<br>Binomial<br>P-Value | FDR-Adj.<br>Propensity<br>-Matched<br>Binomial<br>P-Value |
|-------------------|----------------------------------------|---------------------------------------------------|---------------------------------|----------------------------------------------------|-----------------------------------------------------|-----------------------------------------------------------|
| UC-C SGLT-2i      | 334 / 2,984                            | 4.78                                              | < 2e-16                         | < 2e-16                                            | < 2e-16                                             | < 2e-16                                                   |
| UC-C Meglitinide  | 96 / 2,984                             | 3.04                                              | < 2e-16                         | < 2e-16                                            | < 2e-16                                             | < 2e-16                                                   |
| UC-C GLP-1RA      | 267 / 2,984                            | 2.72                                              | < 2e-16                         | < 2e-16                                            | < 2e-16                                             | < 2e-16                                                   |
| UC-A SGLT-2i      | 39 / 1,557                             | 0.41                                              | < 2e-16                         | < 2e-16                                            | < 2e-16                                             | < 2e-16                                                   |
| UC-C Insulin      | 416 / 2,984                            | 0.61                                              | < 2e-16                         | < 2e-16                                            | < 2e-16                                             | < 2e-16                                                   |
| UC-C DPP-4i       | 833 / 2,984                            | 1.53                                              | < 2e-16                         | < 2e-16                                            | < 2e-16                                             | < 2e-16                                                   |
| UC-C Sulfonylurea | 969 / 2,984                            | 0.66                                              | < 2e-16                         | < 2e-16                                            | < 2e-16                                             | < 2e-16                                                   |
| UC-E Meglitinide  | 5 / 1,389                              | 0.17                                              | < 2e-16                         | 0.0024                                             | 0.0001                                              | < 2e-16                                                   |
| UC-B SGLT-2i      | 3 / 1,829                              | 0.02                                              | < 2e-16                         | 0.0030                                             | < 2e-16                                             | < 2e-16                                                   |
| UC-A Meglitinide  | 7 / 1,557                              | 0.21                                              | < 2e-16                         | 0.0032                                             | < 2e-16                                             | < 2e-16                                                   |
| UC-A DPP-4i       | 192 / 1,557                            | 0.52                                              | < 2e-16                         | 0.0040                                             | < 2e-16                                             | < 2e-16                                                   |
| UC-D Meglitinide  | 27 / 690                               | 2.39                                              | 0.0021                          | < 2e-16                                            | 0.0002                                              | 0.0017                                                    |
| UC-A Insulin      | 406 / 1,557                            | 1.42                                              | < 2e-16                         | 0.0051                                             | < 2e-16                                             | < 2e-16                                                   |
| UC-D Insulin      | 103 / 690                              | 0.74                                              | 0.0176                          | < 2e-16                                            | < 2e-16                                             | < 2e-16                                                   |
| UC-B DPP-4i       | 350 / 1,829                            | 0.86                                              | 0.0334                          | < 2e-16                                            | 0.0010                                              | 0.0001                                                    |
| UC-E Sulfonylurea | 469 / 1,389                            | 0.75                                              | < 2e-16                         | < 2e-16                                            | < 2e-16                                             | 0.4951                                                    |
| UC-B Sulfonylurea | 986 / 1,829                            | 1.33                                              | < 2e-16                         | 1.0                                                | < 2e-16                                             | < 2e-16                                                   |
| UC-A Sulfonylurea | 843 / 1,557                            | 1.32                                              | < 2e-16                         | 1.0                                                | < 2e-16                                             | < 2e-16                                                   |
| UC-B GLP-1RA      | 26 / 1,829                             | 0.22                                              | < 2e-16                         | 1.0                                                | < 2e-16                                             | < 2e-16                                                   |
| UC-D Sulfonylurea | 398 / 690                              | 1.37                                              | < 2e-16                         | 1.0                                                | < 2e-16                                             | < 2e-16                                                   |
| UC-A GLP-1RA      | 33 / 1,557                             | 0.35                                              | < 2e-16                         | 1.0                                                | < 2e-16                                             | < 2e-16                                                   |
| UC-E Insulin      | 345 / 1,389                            | 1.32                                              | < 2e-16                         | 1.0                                                | < 2e-16                                             | < 2e-16                                                   |
| UC-D SGLT-2i      | 13 / 690                               | 0.33                                              | < 2e-16                         | < 2e-16                                            | < 2e-16                                             | 1.0                                                       |
| UC-E GLP-1RA      | 104 / 1,389                            | 1.54                                              | 0.0008                          | < 2e-16                                            | < 2e-16                                             | 1.0                                                       |
| UC-B Insulin      | 401 / 1,829                            | 1.14                                              | 0.1312                          | 1.0                                                | 0.1440                                              | 0.0064                                                    |
| UC-B Meglitinide  | 19 / 1,829                             | 0.51                                              | 0.0486                          | 1.0                                                | 0.1858                                              | 0.2823                                                    |
| UC-E DPP-4i       | 349 / 1,389                            | 1.20                                              | 0.0088                          | < 2e-16                                            | 0.6301                                              | 1.0                                                       |
| UC-D DPP-4i       | 107 / 690                              | 0.70                                              | 0.0005                          | 1.0                                                | 1.0                                                 | < 2e-16                                                   |
| UC-D GLP-1RA      | 17 / 690                               | 0.45                                              | 0.0048                          | 1.0                                                | < 2e-16                                             | 1.0                                                       |
| UC-E SGLT-2i      | 73 / 1,829                             | 0.95                                              | 1.0                             | < 2e-16                                            | 1.0                                                 | 1.0                                                       |
| UC-C TZD          | 56 / 2,984                             | 0.82                                              | 1.0                             | 0.1595                                             | 1.0                                                 | 1.0                                                       |
| UC-E TZD          | 38 / 1,389                             | 1.35                                              | 1.0                             | 1.0                                                | 1.0                                                 | 0.2807                                                    |
| UC-D AGi          | 6 / 690                                | 2.12                                              | 1.0                             | 0.6563                                             | 1.0                                                 | 1.0                                                       |
| UC-D TZD          | 19 / 690                               | 1.32                                              | 1.0                             | 1.0                                                | 0.8625                                              | 1.0                                                       |
| UC-A TZD          | 31 / 1,557                             | 0.91                                              | 1.0                             | 1.0                                                | 1.0                                                 | 1.0                                                       |
| UC-A AGi          | 6 / 1,557                              | 0.84                                              | 1.0                             | 1.0                                                | 1.0                                                 | 1.0                                                       |
| UC-E AGi          | 6 / 1,829                              | 0.96                                              | 1.0                             | 1.0                                                | 1.0                                                 | 1.0                                                       |
| UC-B TZD          | 37 / 1,829                             | 0.93                                              | 1.0                             | 1.0                                                | 1.0                                                 | 1.0                                                       |
| UC-B AGi          | 7 / 1,829                              | 0.81                                              | 1.0                             | 1.0                                                | 1.0                                                 | 1.0                                                       |
| UC-C AGi          | 13 / 2,984                             | 0.95                                              | 1.0                             | 1.0                                                | 1.0                                                 | 1.0                                                       |



**Supplemental Table S5: Number of providers with significant differences in choice of treatment post-Metformin monotherapy.** Providers with at least 3 post-Metformin monotherapy prescriptions were compared to post-Metformin monotherapy prescription patterns for providers at other UC sites. The number of providers with significant differences are listed for each UC site compared to all other UC providers.

|      | <b>Total Providers</b> | <b>Providers With At Least 3 Prescriptions</b> | <b>AGi</b> | <b>DPP-4i</b> | <b>GLP-1RA</b> | <b>Insulin</b> | <b>Meglitinide</b> | <b>SGLT-2i</b> | <b>Sulfonylurea</b> | <b>TZD</b> |
|------|------------------------|------------------------------------------------|------------|---------------|----------------|----------------|--------------------|----------------|---------------------|------------|
| UC-A | 213                    | 70                                             | 0          | 3             | 0              | 0              | 0                  | 0              | 1                   | 0          |
| UC-B | 389                    | 152                                            | 0          | 1             | 0              | 0              | 1                  | 0              | 0                   | 0          |
| UC-C | 770                    | 287                                            | 0          | 2             | 4              | 0              | 0                  | 4              | 2                   | 1          |
| UC-D | 260                    | 71                                             | 0          | 0             | 0              | 0              | 2                  | 0              | 0                   | 0          |
| UC-E | 471                    | 136                                            | 0          | 0             | 0              | 1              | 0                  | 0              | 0                   | 1          |

**Supplemental Table S6: Significant differences across the UC sites in out-class choice of post-Metformin & Sulfonylurea dual therapy.** P-Values for the medication class for each UC site are given for binomial probability significance compared to all other UC sites (Binomial P-Value) as well as significance compared to cohorts of equal size matched by A1c, Framingham Cardiovascular Risk Score (FCRS), or propensity score. The order of this table is determined by the most significantly different, i.e. first by the lowest summation of the four p-values then by the largest odds ratio.

|                  | Total Increased To This Class | Odds Ratio Compared to Other UC Sites | FDR-Adj. Binomial P-Value | FDR-Adj. A1c-Matched Binomial P-Value | FDR-Adj. FCRS-Matched Binomial P-Value | FDR-Adj. Propensity-Matched Binomial P-Value |
|------------------|-------------------------------|---------------------------------------|---------------------------|---------------------------------------|----------------------------------------|----------------------------------------------|
| UC-C Meglitinide | 39 / 1,045                    | 4.34                                  | < 2e-16                   | < 2e-16                               | < 2e-16                                | < 2e-16                                      |
| UC-C SGLT-2i     | 205 / 1,045                   | 4.10                                  | < 2e-16                   | < 2e-16                               | < 2e-16                                | < 2e-16                                      |
| UC-A TZD         | 85 / 727                      | 1.98                                  | < 2e-16                   | < 2e-16                               | < 2e-16                                | < 2e-16                                      |
| UC-A DPP-4i      | 145 / 727                     | 0.51                                  | < 2e-16                   | < 2e-16                               | < 2e-16                                | < 2e-16                                      |
| UC-C Insulin     | 257 / 1,045                   | 0.53                                  | < 2e-16                   | < 2e-16                               | < 2e-16                                | < 2e-16                                      |
| UC-A Insulin     | 450 / 727                     | 1.84                                  | < 2e-16                   | < 2e-16                               | < 2e-16                                | < 2e-16                                      |
| UC-D Insulin     | 92 / 341                      | 0.65                                  | < 2e-16                   | < 2e-16                               | < 2e-16                                | < 2e-16                                      |
| UC-D GLP-1RA     | 42 / 341                      | 2.29                                  | < 2e-16                   | < 2e-16                               | 0.0001                                 | < 2e-16                                      |
| UC-B GLP-1RA     | 12 / 690                      | 0.24                                  | < 2e-16                   | 0.0003                                | < 2e-16                                | < 2e-16                                      |
| UC-B SGLT-2i     | 3 / 690                       | 0.04                                  | < 2e-16                   | 0.0023                                | < 2e-16                                | < 2e-16                                      |
| UC-B DPP-4i      | 293 / 690                     | 1.28                                  | < 2e-16                   | < 2e-16                               | < 2e-16                                | 0.0063                                       |
| UC-A Meglitinide | 1 / 727                       | 0.06                                  | 0.0001                    | 0.0066                                | < 2e-16                                | 0.0001                                       |
| UC-E GLP-1RA     | 54 / 561                      | 1.79                                  | 0.0017                    | < 2e-16                               | 0.0002                                 | 0.0151                                       |
| UC-C GLP-1RA     | 86 / 1,045                    | 1.60                                  | 0.0008                    | < 2e-16                               | < 2e-16                                | 0.0211                                       |
| UC-D DPP-4i      | 147 / 341                     | 1.26                                  | 0.0209                    | 0.0001                                | < 2e-16                                | 0.0049                                       |
| UC-A GLP-1RA     | 11 / 727                      | 0.21                                  | < 2e-16                   | 0.0453                                | < 2e-16                                | < 2e-16                                      |
| UC-C TZD         | 48 / 1,045                    | 0.55                                  | 0.0001                    | < 2e-16                               | 0.0003                                 | 0.0553                                       |
| UC-A SGLT-2i     | 32 / 727                      | 0.41                                  | < 2e-16                   | 0.0881                                | < 2e-16                                | < 2e-16                                      |
| UC-B Insulin     | 328 / 690                     | 1.26                                  | < 2e-16                   | 0.2969                                | 0.0009                                 | < 2e-16                                      |
| UC-E Meglitinide | 1 / 561                       | 0.09                                  | 0.0091                    | 0.0063                                | 0.4364                                 | 0.0003                                       |
| UC-C DPP-4i      | 399 / 1,045                   | 1.14                                  | 0.0727                    | 0.4258                                | 0.0025                                 | 1.0                                          |
| UC-D Meglitinide | 7 / 341                       | 1.19                                  | 1.0                       | 1.0                                   | < 2e-16                                | 1.0                                          |
| UC-D SGLT-2i     | 24 / 341                      | 0.73                                  | 1.0                       | < 2e-16                               | 1.0                                    | 1.0                                          |
| UC-E Insulin     | 212 / 561                     | 0.94                                  | 1.0                       | < 2e-16                               | 1.0                                    | 1.0                                          |
| UC-E SGLT-2i     | 52 / 561                      | 0.99                                  | 1.0                       | < 2e-16                               | 1.0                                    | 1.0                                          |
| UC-E AGi         | 7 / 561                       | 1.95                                  | 1.0                       | 1.0                                   | 1.0                                    | 0.0028                                       |
| UC-B TZD         | 41 / 690                      | 0.79                                  | 1.0                       | 0.0689                                | 1.0                                    | 1.0                                          |
| UC-A AGi         | 3 / 727                       | 0.50                                  | 1.0                       | 1.0                                   | 1.0                                    | 1.0                                          |
| UC-D TZD         | 27 / 341                      | 1.12                                  | 1.0                       | 1.0                                   | 1.0                                    | 1.0                                          |
| UC-D AGi         | 2 / 341                       | 0.77                                  | 1.0                       | 1.0                                   | 1.0                                    | 1.0                                          |
| UC-B Meglitinide | 11 / 690                      | 0.89                                  | 1.0                       | 1.0                                   | 1.0                                    | 1.0                                          |
| UC-B AGi         | 2 / 690                       | 0.34                                  | 1.0                       | 1.0                                   | 1.0                                    | 1.0                                          |
| UC-E TZD         | 40 / 561                      | 0.99                                  | 1.0                       | 1.0                                   | 1.0                                    | 1.0                                          |
| UC-E DPP-4i      | 195 / 561                     | 0.99                                  | 1.0                       | 1.0                                   | 1.0                                    | 1.0                                          |
| UC-C AGi         | 11 / 1,045                    | 1.76                                  | 1.0                       | 1.0                                   | 1.0                                    | 1.0                                          |

**Supplemental Table S7: Number of providers with significant differences in choice of treatment post-Metformin & Sulfonylurea dual therapy.**

Providers with at least 3 post-Metformin & Sulfonylurea dual therapy prescriptions were compared to post-Metformin & Sulfonylurea dual therapy prescription patterns for providers at other UC sites. The number of providers with significant differences are listed for each UC site compared to all other UC providers.

|      | <b>Total Providers</b> | <b>Providers With At Least 3 Prescriptions</b> | <b>AGi</b> | <b>DPP-4i</b> | <b>GLP-1RA</b> | <b>Insulin</b> | <b>Meglitinides</b> | <b>SGLT-2i</b> | <b>TZD</b> |
|------|------------------------|------------------------------------------------|------------|---------------|----------------|----------------|---------------------|----------------|------------|
| UC-A | 132                    | 42                                             | 0          | 0             | 0              | 1              | 0                   | 0              | 0          |
| UC-B | 234                    | 93                                             | 0          | 0             | 0              | 0              | 0                   | 0              | 0          |
| UC-C | 433                    | 125                                            | 0          | 0             | 0              | 0              | 0                   | 2              | 0          |
| UC-D | 176                    | 32                                             | 0          | 0             | 1              | 0              | 0                   | 0              | 0          |
| UC-E | 273                    | 59                                             | 1          | 0             | 1              | 0              | 0                   | 0              | 0          |

**Supplemental Table S8: Significant differences across the UC sites in first choice of Sulfonylurea.**

P-Values for the medication class for each UC site are given for binomial probability significance compared to all other UC sites (Binomial P-Value) as well as significance compared to cohorts of equal size matched by A1c, Framingham Cardiovascular Risk Score (FCRS), or propensity score. The order of this table is determined by the most significantly different, i.e. first by the lowest summation of the four p-values then by the largest odds ratio.

|                  | Total Increased To This Class | Odds Ratio Compared to Other UC Sites | FDR-Adj. Binomial P-Value | FDR-Adj. A1c-Matched Binomial P-Value | FDR-Adj. FCRS-Matched Binomial P-Value | FDR-Adj. Propensity-Matched Binomial P-Value |
|------------------|-------------------------------|---------------------------------------|---------------------------|---------------------------------------|----------------------------------------|----------------------------------------------|
| UC-A Glipizide   | 1,628 / 1,936                 | 1.24                                  | < 2e-16                   | < 2e-16                               | < 2e-16                                | < 2e-16                                      |
| UC-C Glimepiride | 704 / 3,065                   | 1.77                                  | < 2e-16                   | < 2e-16                               | < 2e-16                                | < 2e-16                                      |
| UC-A Glyburide   | 130 / 1,936                   | 0.46                                  | < 2e-16                   | < 2e-16                               | < 2e-16                                | < 2e-16                                      |
| UC-C Glipizide   | 1,998 / 3,065                 | 0.89                                  | < 2e-16                   | < 2e-16                               | < 2e-16                                | < 2e-16                                      |
| UC-A Glimepiride | 178 / 1,936                   | 0.53                                  | < 2e-16                   | 0.0002                                | < 2e-16                                | < 2e-16                                      |
| UC-B Glyburide   | 467 / 2,769                   | 1.42                                  | < 2e-16                   | 1.0                                   | < 2e-16                                | < 2e-16                                      |
| UC-B Glimepiride | 361 / 2,769                   | 0.77                                  | < 2e-16                   | 1.0                                   | < 2e-16                                | < 2e-16                                      |
| UC-E Glyburide   | 273 / 1,652                   | 1.31                                  | 0.0001                    | 0.0092                                | 0.0009                                 | < 2e-16                                      |
| UC-C Glyburide   | 363 / 3,065                   | 0.86                                  | 0.0294                    | < 2e-16                               | 0.3287                                 | < 2e-16                                      |
| UC-E Glipizide   | 1,126 / 1,652                 | 0.95                                  | 0.0532                    | 1.0                                   | 0.0153                                 | < 2e-16                                      |
| UC-B Glipizide   | 1,941 / 2,769                 | 0.98                                  | 1.0                       | 0.8210                                | 0.8210                                 | 0.0002                                       |
| UC-D Glyburide   | 159 / 1,126                   | 1.08                                  | 1.0                       | < 2e-16                               | 0.0258                                 | 1.0                                          |
| UC-D Glipizide   | 789 / 1,126                   | 0.99                                  | 1.0                       | 0.0569                                | 0.0119                                 | 1.0                                          |
| UC-D Glimepiride | 178 / 1,126                   | 1.00                                  | 1.0                       | 0.0003                                | 1.0                                    | 1.0                                          |
| UC-E Glimepiride | 253 / 1,652                   | 0.96                                  | 1.0                       | 0.0012                                | 1.0                                    | 1.0                                          |

**Supplemental Table S9: Number of providers with significant differences in first choice of Sulfonylurea.** Providers with at least 3 Sulfonylurea prescriptions were compared to Sulfonylurea prescription patterns for providers at other UC sites. The number of providers with significant differences are listed for each UC site compared to all other UC providers.

|      | <b>Total Providers</b> | <b>Providers With At Least 3 Prescriptions</b> | <b>Glimepiride</b> | <b>Glipizide</b> | <b>Glyburide</b> |
|------|------------------------|------------------------------------------------|--------------------|------------------|------------------|
| UC-A | 234                    | 92                                             | 3                  | 6                | 0                |
| UC-B | 508                    | 187                                            | 2                  | 2                | 4                |
| UC-C | 789                    | 293                                            | 12                 | 7                | 1                |
| UC-D | 379                    | 97                                             | 1                  | 1                | 0                |
| UC-E | 520                    | 153                                            | 4                  | 3                | 2                |

**Supplemental Table S10: Significant differences across the UC sites in first choice of DPP-4i.** P-Values for the medication class for each UC site are given for binomial probability significance compared to all other UC sites (Binomial P-Value) as well as significance compared to cohorts of equal size matched by A1c, Framingham Cardiovascular Risk Score (FCRS), or propensity score. The order of this table is determined by the most significantly different, i.e. first by the lowest summation of the four p-values then by the largest odds ratio.

|                  | <b>Total<br/>Increased To<br/>This Class</b> | <b>Odds Ratio<br/>Compared<br/>to Other<br/>UC Sites</b> | <b>FDR-Adj.<br/>Binomial<br/>P-Value</b> | <b>FDR-Adj.<br/>A1c-<br/>Matched<br/>Binomial<br/>P-Value</b> | <b>FDR-Adj.<br/>FCRS-<br/>Matched<br/>Binomial<br/>P-Value</b> | <b>FDR-Adj.<br/>Propensity<br/>-Matched<br/>Binomial<br/>P-Value</b> |
|------------------|----------------------------------------------|----------------------------------------------------------|------------------------------------------|---------------------------------------------------------------|----------------------------------------------------------------|----------------------------------------------------------------------|
| UC-A Alogliptin  | 117 / 1,110                                  | 17.28                                                    | < 2e-16                                  | < 2e-16                                                       | < 2e-16                                                        | < 2e-16                                                              |
| UC-B Linagliptin | 1 / 1,517                                    | 0.01                                                     | < 2e-16                                  | < 2e-16                                                       | < 2e-16                                                        | < 2e-16                                                              |
| UC-B Sitagliptin | 1,486 / 1,517                                | 1.18                                                     | < 2e-16                                  | < 2e-16                                                       | < 2e-16                                                        | < 2e-16                                                              |
| UC-A Sitagliptin | 764 / 1,110                                  | 0.78                                                     | < 2e-16                                  | < 2e-16                                                       | < 2e-16                                                        | < 2e-16                                                              |
| UC-A Linagliptin | 223 / 1,110                                  | 2.32                                                     | < 2e-16                                  | < 2e-16                                                       | < 2e-16                                                        | < 2e-16                                                              |
| UC-D Alogliptin  | 1 / 652                                      | 0.07                                                     | 0.0003                                   | < 2e-16                                                       | < 2e-16                                                        | < 2e-16                                                              |
| UC-A Saxagliptin | 6 / 1,110                                    | 0.26                                                     | 0.0010                                   | 0.0002                                                        | < 2e-16                                                        | 0.0002                                                               |
| UC-D Sitagliptin | 605 / 652                                    | 1.09                                                     | < 2e-16                                  | 0.0025                                                        | < 2e-16                                                        | < 2e-16                                                              |
| UC-B Alogliptin  | 3 / 1,517                                    | 0.08                                                     | < 2e-16                                  | 0.0077                                                        | < 2e-16                                                        | < 2e-16                                                              |
| UC-D Linagliptin | 36 / 652                                     | 0.51                                                     | 0.0001                                   | 0.0002                                                        | 0.0204                                                         | < 2e-16                                                              |
| UC-C Linagliptin | 337 / 2,913                                  | 1.21                                                     | 0.0050                                   | < 2e-16                                                       | 0.1321                                                         | < 2e-16                                                              |
| UC-C Alogliptin  | 10 / 2,913                                   | 0.11                                                     | < 2e-16                                  | 0.1417                                                        | < 2e-16                                                        | < 2e-16                                                              |
| UC-E Sitagliptin | 1260 / 1,517                                 | 0.96                                                     | 0.0029                                   | < 2e-16                                                       | 0.0008                                                         | < 2e-16                                                              |
| UC-E Linagliptin | 197 / 1,517                                  | 1.35                                                     | 0.0005                                   | < 2e-16                                                       | 0.0003                                                         | 0.9423                                                               |
| UC-C Saxagliptin | 66 / 2,913                                   | 1.41                                                     | 0.1263                                   | 1.0                                                           | 0.0521                                                         | 0.3458                                                               |
| UC-E Saxagliptin | 34 / 1,517                                   | 1.27                                                     | 1.0                                      | 1.0                                                           | 0.1568                                                         | 0.0322                                                               |
| UC-C Sitagliptin | 2500 / 2,913                                 | 1.00                                                     | 1.0                                      | < 2e-16                                                       | 1.0                                                            | 0.8726                                                               |
| UC-E Alogliptin  | 26 / 1,517                                   | 0.81                                                     | 1.0                                      | < 2e-16                                                       | 1.0                                                            | 1.0                                                                  |
| UC-D Saxagliptin | 10 / 652                                     | 0.82                                                     | 1.0                                      | 1.0                                                           | 1.0                                                            | 1.0                                                                  |
| UC-B Saxagliptin | 27 / 1,517                                   | 0.95                                                     | 1.0                                      | 1.0                                                           | 1.0                                                            | 1.0                                                                  |

**Supplemental Table S11: Number of providers with significant differences in first choice of DPP-4i.** Providers with at least 3 DPP-4i prescriptions were compared to DPP-4i prescription patterns for providers at other UC sites. The number of providers with significant differences are listed for each UC site compared to all other UC providers.

|      | Total Providers | Providers With At Least 3 Prescriptions | Alogliptin | Linagliptin | Saxagliptin | Sitagliptin |
|------|-----------------|-----------------------------------------|------------|-------------|-------------|-------------|
| UC-A | 211             | 71                                      | 6          | 2           | 0           | 3           |
| UC-B | 336             | 120                                     | 0          | 0           | 0           | 0           |
| UC-C | 740             | 291                                     | 0          | 1           | 0           | 1           |
| UC-D | 274             | 66                                      | 0          | 0           | 0           | 0           |
| UC-E | 479             | 141                                     | 0          | 0           | 1           | 1           |

**Supplemental Table S12: Significant differences across the UC sites in first choice of SGLT-2i.** P-Values for the medication class for each UC site are given for binomial probability significance compared to all other UC sites (Binomial P-Value) as well as significance compared to cohorts of equal size matched by A1c, Framingham Cardiovascular Risk Score (FCRS), or propensity score. The order of this table is determined by the most significantly different, i.e. first by the lowest summation of the four p-values then by the largest odds ratio.

|                    | Total Increased To This Class | Odds Ratio Compared to Other UC Sites | FDR-Adj. Binomial P-Value | FDR-Adj. A1c-Matched Binomial P-Value | FDR-Adj. FCRS-Matched Binomial P-Value | FDR-Adj. Propensity-Matched Binomial P-Value |
|--------------------|-------------------------------|---------------------------------------|---------------------------|---------------------------------------|----------------------------------------|----------------------------------------------|
| UC-A Empagliflozin | 279 / 444                     | 1.15                                  | 0.0062                    | < 2e-16                               | 0.0006                                 | < 2e-16                                      |
| UC-D Empagliflozin | 65 / 175                      | 0.66                                  | < 2e-16                   | 0.0418                                | < 2e-16                                | < 2e-16                                      |
| UC-D Canagliflozin | 101 / 175                     | 1.53                                  | < 2e-16                   | 0.1142                                | < 2e-16                                | < 2e-16                                      |
| UC-C Canagliflozin | 914 / 2,262                   | 1.14                                  | < 2e-16                   | < 2e-16                               | 0.0002                                 | 0.1539                                       |
| UC-A Dapagliflozin | 14 / 444                      | 0.51                                  | 0.0836                    | 0.0066                                | 0.0660                                 | 0.1708                                       |
| UC-A Canagliflozin | 151 / 444                     | 0.86                                  | 0.3351                    | < 2e-16                               | 0.0754                                 | 0.0012                                       |
| UC-C Empagliflozin | 1219 / 2,262                  | 0.92                                  | 0.0001                    | < 2e-16                               | 0.0002                                 | 0.4842                                       |
| UC-E Dapagliflozin | 46 / 555                      | 1.56                                  | 0.0470                    | < 2e-16                               | 0.6163                                 | 0.0329                                       |
| UC-E Canagliflozin | 166 / 555                     | 0.74                                  | < 2e-16                   | < 2e-16                               | < 2e-16                                | 1.0                                          |
| UC-E Empagliflozin | 343 / 555                     | 1.14                                  | 0.0060                    | < 2e-16                               | 0.0001                                 | 1.0                                          |
| UC-B Canagliflozin | 7 / 25                        | 0.72                                  | 1.0                       | < 2e-16                               | 1.0                                    | 1.0                                          |
| UC-B Dapagliflozin | 2 / 25                        | 1.39                                  | 1.0                       | < 2e-16                               | 1.0                                    | 1.0                                          |
| UC-B Empagliflozin | 16 / 25                       | 1.15                                  | 1.0                       | < 2e-16                               | 1.0                                    | 1.0                                          |
| UC-C Dapagliflozin | 129 / 2,262                   | 0.96                                  | 1.0                       | 0.2975                                | 1.0                                    | 1.0                                          |
| UC-D Dapagliflozin | 9 / 175                       | 0.89                                  | 1.0                       | 1.0                                   | 0.9946                                 | 1.0                                          |

**Supplemental Table S13: Number of providers with significant differences in first choice of SGLT-2i.** Providers with at least 3 SGLT-2i prescriptions were compared to SGLT-2i prescription patterns for providers at other UC sites. The number of providers with significant differences are listed for each UC site compared to all other UC providers.

|      | <b>Total Providers</b> | <b>Providers With At Least 3 Prescriptions</b> | <b>Canagliflozin</b> | <b>Dapagliflozin</b> | <b>Empagliflozin</b> |
|------|------------------------|------------------------------------------------|----------------------|----------------------|----------------------|
| UC-A | 113                    | 32                                             | 0                    | 0                    | 0                    |
| UC-B | 60                     | 1                                              | 0                    | 0                    | 0                    |
| UC-C | 588                    | 205                                            | 4                    | 0                    | 2                    |
| UC-D | 99                     | 7                                              | 1                    | 0                    | 1                    |
| UC-E | 268                    | 60                                             | 0                    | 1                    | 0                    |



**Supplemental Table S14: Significant differences across the UC sites in first choice of GLP-1RA.**

P-Values for the medication class for each UC site are given for binomial probability significance compared to all other UC sites (Binomial P-Value) as well as significance compared to cohorts of equal size matched by A1c, Framingham Cardiovascular Risk Score (FCRS), or propensity score. The order of this table is determined by the most significantly different, i.e. first by the lowest summation of the four p-values then by the largest odds ratio.

|                   | <b>Total Increased To This Class</b> | <b>Odds Ratio Compared to Other UC Sites</b> | <b>FDR-Adj. Binomial P-Value</b> | <b>FDR-Adj. A1c-Matched Binomial P-Value</b> | <b>FDR-Adj. FCRS-Matched Binomial P-Value</b> | <b>FDR-Adj. Propensity-Matched Binomial P-Value</b> |
|-------------------|--------------------------------------|----------------------------------------------|----------------------------------|----------------------------------------------|-----------------------------------------------|-----------------------------------------------------|
| UC-C Dulaglutide  | 1,091 / 2,129                        | 1.92                                         | < 2e-16                          | < 2e-16                                      | < 2e-16                                       | < 2e-16                                             |
| UC-C Exenatide    | 167 / 2,129                          | 0.33                                         | < 2e-16                          | < 2e-16                                      | < 2e-16                                       | < 2e-16                                             |
| UC-B Exenatide    | 114 / 187                            | 4.70                                         | < 2e-16                          | < 2e-16                                      | < 2e-16                                       | < 2e-16                                             |
| UC-B Liraglutide  | 0 / 187                              | < 0.01                                       | < 2e-16                          | < 2e-16                                      | < 2e-16                                       | < 2e-16                                             |
| UC-A Liraglutide  | 282 / 472                            | 1.64                                         | < 2e-16                          | < 2e-16                                      | < 2e-16                                       | < 2e-16                                             |
| UC-C Lixisenatide | 32 / 2,129                           | 6.83                                         | < 2e-16                          | < 2e-16                                      | < 2e-16                                       | < 2e-16                                             |
| UC-C Liraglutide  | 760 / 2,129                          | 0.82                                         | < 2e-16                          | < 2e-16                                      | < 2e-16                                       | < 2e-16                                             |
| UC-D Dulaglutide  | 53 / 258                             | 0.50                                         | < 2e-16                          | < 2e-16                                      | < 2e-16                                       | < 2e-16                                             |
| UC-C Albiglutide  | 8 / 2,129                            | 0.21                                         | < 2e-16                          | < 2e-16                                      | < 2e-16                                       | < 2e-16                                             |
| UC-E Exenatide    | 182 / 886                            | 1.50                                         | < 2e-16                          | 0.0001                                       | < 2e-16                                       | < 2e-16                                             |
| UC-E Dulaglutide  | 293 / 886                            | 0.79                                         | < 2e-16                          | < 2e-16                                      | < 2e-16                                       | 0.0001                                              |
| UC-D Liraglutide  | 152 / 258                            | 1.56                                         | < 2e-16                          | 0.0040                                       | < 2e-16                                       | < 2e-16                                             |
| UC-E Albiglutide  | 19 / 886                             | 2.98                                         | 0.0011                           | 0.1046                                       | < 2e-16                                       | 0.0005                                              |
| UC-A Exenatide    | 100 / 472                            | 1.47                                         | 0.0024                           | < 2e-16                                      | 0.0734                                        | 0.0453                                              |
| UC-A Dulaglutide  | 67 / 472                             | 0.33                                         | < 2e-16                          | 1.0                                          | < 2e-16                                       | < 2e-16                                             |
| UC-E Semaglutide  | 40 / 886                             | 1.38                                         | 1.0                              | < 2e-16                                      | 0.0737                                        | 1.0                                                 |
| UC-B Semaglutide  | 0 / 187                              | < 0.01                                       | 0.0458                           | 1.0                                          | 0.0459                                        | 1.0                                                 |
| UC-B Albiglutide  | 4 / 187                              | 2.16                                         | 1.0                              | < 2e-16                                      | 1.0                                           | 0.5598                                              |
| UC-B Dulaglutide  | 68 / 187                             | 0.91                                         | 1.0                              | < 2e-16                                      | 0.5605                                        | 1.0                                                 |
| UC-A Semaglutide  | 17 / 472                             | 1.05                                         | 1.0                              | < 2e-16                                      | 1.0                                           | 1.0                                                 |
| UC-B Lixisenatide | 1 / 187                              | 0.58                                         | 1.0                              | < 2e-16                                      | 1.0                                           | 1.0                                                 |
| UC-D Exenatide    | 37 / 258                             | 0.94                                         | 1.0                              | < 2e-16                                      | 1.0                                           | 1.0                                                 |
| UC-D Semaglutide  | 12 / 258                             | 1.34                                         | 1.0                              | < 2e-16                                      | 1.0                                           | 1.0                                                 |
| UC-E Liraglutide  | 349 / 886                            | 1.01                                         | 1.0                              | < 2e-16                                      | 1.0                                           | 1.0                                                 |
| UC-A Albiglutide  | 6 / 472                              | 1.26                                         | 1.0                              | 1.0                                          | 0.0174                                        | 1.0                                                 |
| UC-E Lixisenatide | 3 / 886                              | 0.31                                         | 0.9671                           | 1.0                                          | 0.0561                                        | 1.0                                                 |
| UC-C Semaglutide  | 71 / 2,129                           | 0.87                                         | 1.0                              | 0.0266                                       | 1.0                                           | 1.0                                                 |
| UC-D Lixisenatide | 0 / 258                              | < 0.01                                       | 1.0                              | 1.0                                          | 0.1658                                        | 1.0                                                 |
| UC-A Lixisenatide | 0 / 472                              | < 0.01                                       | 0.3511                           | 1.0                                          | 1.0                                           | 1.0                                                 |
| UC-D Albiglutide  | 4 / 258                              | 1.54                                         | 1.0                              | 1.0                                          | 0.5625                                        | 1.0                                                 |

**Supplemental Table S15 Number of providers with significant differences in first choice of GLP-1RA.** Providers with at least 3 GLP-1RA prescriptions were compared to GLP-1RA prescription patterns for providers at other UC sites. The number of providers with significant differences are listed for each UC site compared to all other UC providers.

|      | Total Providers | Providers With At Least 3 Prescriptions | Albiglutide | Dulaglutide | Exenatide | Liraglutide | Lixisenatide | Semaglutide |
|------|-----------------|-----------------------------------------|-------------|-------------|-----------|-------------|--------------|-------------|
| UC-A | 141             | 39                                      | 0           | 1           | 0         | 0           | 0            | 0           |
| UC-B | 102             | 20                                      | 0           | 0           | 1         | 0           | 0            | 0           |
| UC-C | 638             | 209                                     | 0           | 0           | 1         | 0           | 1            | 1           |
| UC-D | 132             | 15                                      | 0           | 0           | 0         | 0           | 0            | 0           |
| UC-E | 376             | 81                                      | 2           | 1           | 1         | 1           | 0            | 1           |

**Supplemental Table S16: Significant differences across the UC sites in first choice of Meglitinides.** P-Values for the medication class for each UC site are given for binomial probability significance compared to all other UC sites (Binomial P-Value) as well as significance compared to cohorts of equal size matched by A1c, Framingham Cardiovascular Risk Score (FCRS), or propensity score. The order of this table is determined by the most significantly different, i.e. first by the lowest summation of the four p-values then by the largest odds ratio.

|                  | Total Increased To This Class | Odds Ratio Compared to Other UC Sites | FDR-Adj. Binomial P-Value | FDR-Adj. A1c-Matched Binomial P-Value | FDR-Adj. FCRS-Matched Binomial P-Value | FDR-Adj. Propensity-Matched Binomial P-Value |
|------------------|-------------------------------|---------------------------------------|---------------------------|---------------------------------------|----------------------------------------|----------------------------------------------|
| UC-E Nateglinide | 25 / 44                       | 2.13                                  | 0.0002                    | < 2e-16                               | 0.0001                                 | 0.0001                                       |
| UC-E Repaglinide | 19 / 44                       | 0.59                                  | 0.0002                    | < 2e-16                               | 0.0001                                 | 0.0001                                       |
| UC-B Repaglinide | 114 / 134                     | 1.19                                  | 0.0025                    | 0.0224                                | 0.0005                                 | 0.0067                                       |
| UC-B Nateglinide | 20 / 134                      | 0.52                                  | 0.0025                    | 0.0224                                | 0.0005                                 | 0.0067                                       |
| UC-C Repaglinide | 761 / 1,065                   | 0.95                                  | 0.1092                    | 0.0001                                | 1.0                                    | 0.193                                        |
| UC-C Nateglinide | 304 / 1,065                   | 1.14                                  | 0.1092                    | 0.0001                                | 1.0                                    | 0.193                                        |
| UC-A Repaglinide | 71 / 93                       | 1.06                                  | 1.0                       | 1.0                                   | 1.0                                    | 0.1694                                       |
| UC-A Nateglinide | 22 / 93                       | 0.85                                  | 1.0                       | 1.0                                   | 1.0                                    | 0.1694                                       |
| UC-D Repaglinide | 133 / 179                     | 1.03                                  | 1.0                       | 1.0                                   | 1.0                                    | 0.388                                        |
| UC-D Nateglinide | 46 / 179                      | 0.93                                  | 1.0                       | 1.0                                   | 1.0                                    | 0.388                                        |

**Supplemental Table S17: Number of providers with significant differences in first choice of Meglitinide.** Providers with at least 3 Meglitinide prescriptions were compared to Meglitinide prescription patterns for providers at other UC sites. The number of providers with significant differences are listed for each UC site compared to all other UC providers.

|      | Total Providers | Providers With At Least 3 Prescriptions | Nateglinide | Repaglinide |
|------|-----------------|-----------------------------------------|-------------|-------------|
| UC-A | 45              | 5                                       | 0           | 0           |
| UC-B | 60              | 14                                      | 0           | 0           |
| UC-C | 451             | 110                                     | 2           | 2           |
| UC-D | 99              | 11                                      | 0           | 0           |
| UC-E | 40              | 1                                       | 0           | 0           |

**Supplemental Table S18: Significant differences across the UC sites in first choice of AGi.** P-Values for the medication class for each UC site are given for binomial probability significance compared to all other UC sites (Binomial P-Value) as well as significance compared to cohorts of equal size matched by A1c, Framingham Cardiovascular Risk Score (FCRS), or propensity score. The order of this table is determined by the most significantly different, i.e. first by the lowest summation of the four p-values then by the largest odds ratio.

|               | Total Increased To This Class | Odds Ratio Compared to Other UC Sites | FDR-Adj. Binomial P-Value | FDR-Adj. A1c-Matched Binomial P-Value | FDR-Adj. FCRS-Matched Binomial P-Value | FDR-Adj. Propensity-Matched Binomial P-Value |
|---------------|-------------------------------|---------------------------------------|---------------------------|---------------------------------------|----------------------------------------|----------------------------------------------|
| UC-D Miglitol | 2 / 45                        | 4.68                                  | 0.6823                    | < 2e-16                               | 1.0                                    | < 2e-16                                      |
| UC-D Acarbose | 43 / 45                       | 0.97                                  | 0.6823                    | < 2e-16                               | 1.0                                    | < 2e-16                                      |
| UC-A Acarbose | 67 / 68                       | 1.00                                  | 1.0                       | 1.0                                   | < 2e-16                                | < 2e-16                                      |
| UC-A Miglitol | 1 / 68                        | 1.07                                  | 1.0                       | 1.0                                   | < 2e-16                                | < 2e-16                                      |
| UC-E Acarbose | 61 / 61                       | 1.02                                  | 1.0                       | 1.0                                   | 1.0                                    | 1.0                                          |
| UC-E Miglitol | 0 / 61                        | < 0.01                                | 1.0                       | 1.0                                   | 1.0                                    | 1.0                                          |
| UC-B Acarbose | 29 / 29                       | 1.02                                  | 1.0                       | 1.0                                   | 1.0                                    | 1.0                                          |
| UC-B Miglitol | 0 / 29                        | < 0.01                                | 1.0                       | 1.0                                   | 1.0                                    | 1.0                                          |
| UC-C Acarbose | 156 / 158                     | 1.00                                  | 1.0                       | 1.0                                   | 1.0                                    | 1.0                                          |
| UC-C Miglitol | 2 / 158                       | 0.86                                  | 1.0                       | 1.0                                   | 1.0                                    | 1.0                                          |

**Supplemental Table S19: Number of providers with significant differences in first choice of AGI.** Providers with at least 3 AGI prescriptions were compared to AGI prescription patterns for providers at other UC sites. The number of providers with significant differences are listed for each UC site compared to all other UC providers. No significant differences were found.

|      | Total Providers | Providers With At Least 3 Prescriptions | Acarbose | Miglitol |
|------|-----------------|-----------------------------------------|----------|----------|
| UC-A | 37              | 4                                       | 0        | 0        |
| UC-B | 27              | 1                                       | 0        | 0        |
| UC-C | 110             | 12                                      | 0        | 0        |
| UC-D | 32              | 4                                       | 0        | 0        |
| UC-E | 36              | 3                                       | 0        | 0        |

**Supplemental Table S20: Significant differences across the UC sites cardioprotective medication utilization.** P-Values for the utilization of cardioprotective medications for each UC site are given for binomial probability significance compared to all other UC sites (Binomial P-Value) as well as significance compared to cohorts of equal size matched by A1c, Framingham Cardiovascular Risk Score (FCRS), or propensity score. The order of this table is determined by the most significantly different, i.e. first by the lowest summation of the four p-values then by the largest odds ratio.

|      | Number of High-Risk Patients Utilizing Cardioprotective Medications | Odds Ratio Compared to Other UC Sites | FDR-Adj. Binomial P-Value | FDR-Adj. A1c-Matched Binomial P-Value | FDR-Adj. FCRS-Matched Binomial P-Value | FDR-Adj. Propensity-Matched Binomial P-Value |
|------|---------------------------------------------------------------------|---------------------------------------|---------------------------|---------------------------------------|----------------------------------------|----------------------------------------------|
| UC-B | 2 / 1,919                                                           | 0.0109                                | < 2e-16                   | < 2e-16                               | < 2e-16                                | < 2e-16                                      |
| UC-C | 492 / 4,517                                                         | 1.9075                                | < 2e-16                   | < 2e-16                               | < 2e-16                                | < 2e-16                                      |
| UC-A | 151 / 1,548                                                         | 1.2862                                | 0.0018                    | < 2e-16                               | 0.0377                                 | < 2e-16                                      |
| UC-E | 44 / 897                                                            | 1.106                                 | 0.1884                    | < 2e-16                               | 0.0425                                 | < 2e-16                                      |
| UC-D | 156 / 1,818                                                         | 0.6003                                | 0.0002                    | < 2e-16                               | < 2e-16                                | 0.7515                                       |

**Supplemental Table S21: Number of providers with significant differences in cardioprotective medication utilization.** Providers with at least 3 prescriptions for high-risk patients were compared to prescription patterns for providers at other UC sites. The number of providers with significant differences are listed for each UC site compared to all other UC providers.

|      | Total Providers | Providers With At Least 3 Prescriptions for High-Risk Patients | Number of Providers with Significantly Increased Cardioprotective Utilization | Number of Providers with Significantly Decreased Cardioprotective Utilization |
|------|-----------------|----------------------------------------------------------------|-------------------------------------------------------------------------------|-------------------------------------------------------------------------------|
| UC-A | 44              | 4                                                              | 0                                                                             | 4                                                                             |
| UC-B | 32              | 1                                                              | 7                                                                             | 3                                                                             |
| UC-C | 133             | 12                                                             | 36                                                                            | 1                                                                             |
| UC-D | 56              | 4                                                              | 10                                                                            | 0                                                                             |
| UC-E | 48              | 3                                                              | 2                                                                             | 0                                                                             |
